# Supplementary material for: Acss2/HIF-2 signaling facilitates colon cancer growth and metastasis
Source: PubMed Central journal article supplement (PMC9980813; doi:10.1371/journal.pone.0282223), 2023-03-02

HIF1 $\alpha$  and HIF2 $\alpha$  expression in HCT116 and HT29 cells

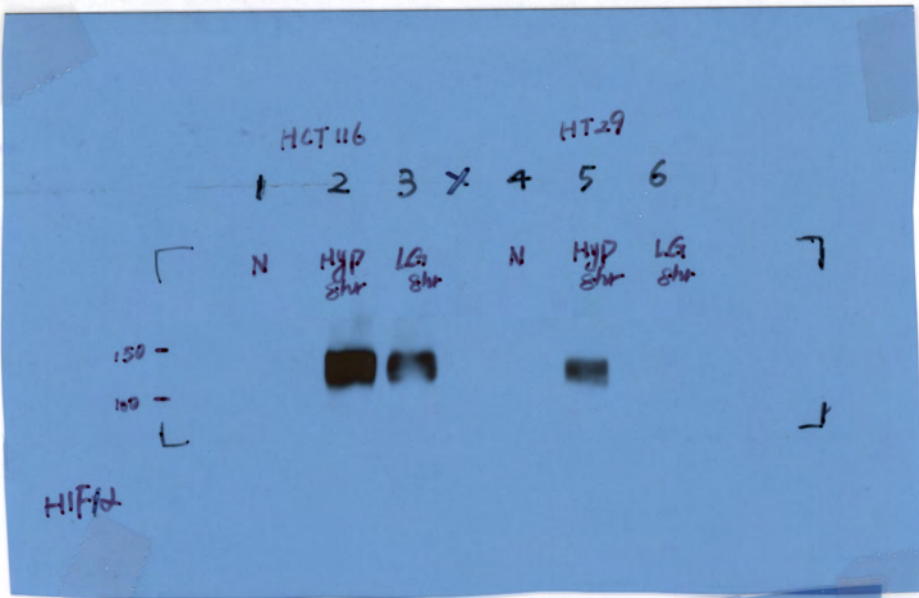

Fig. 1A, 2A

Hypoxia (HYP) / Low GLUCOSE (LG)

IB: HIF1 $\alpha$

SHORT EXP

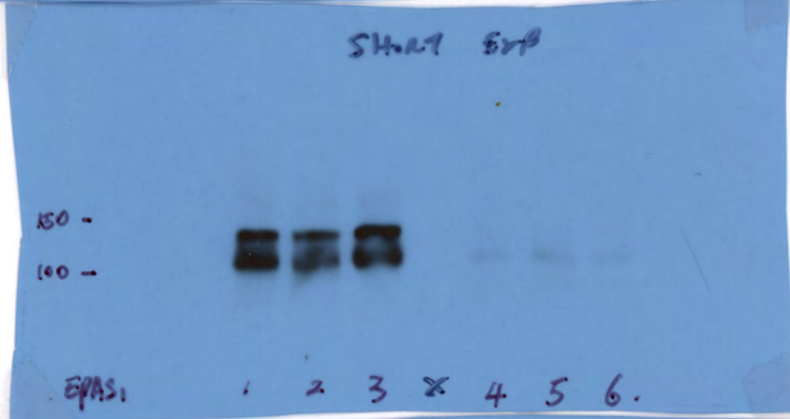

IB: HIF-2 $\alpha$  (SHORT EXP)

IB: HIF2 $\alpha$  (LONG EXP)

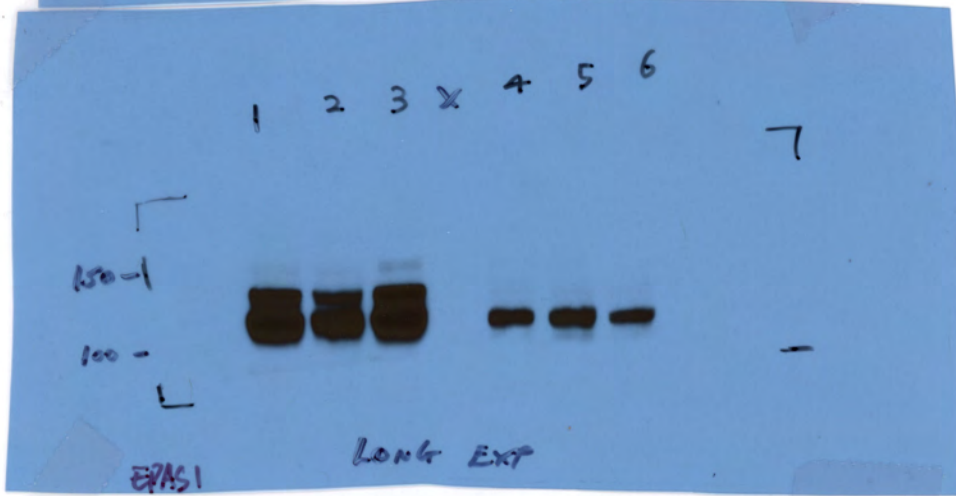

Fig. 1A, 2A

IB:  $\alpha$ -TUBULIN (MEMBRANE CUT FROM HIF-2 $\alpha$  IB)

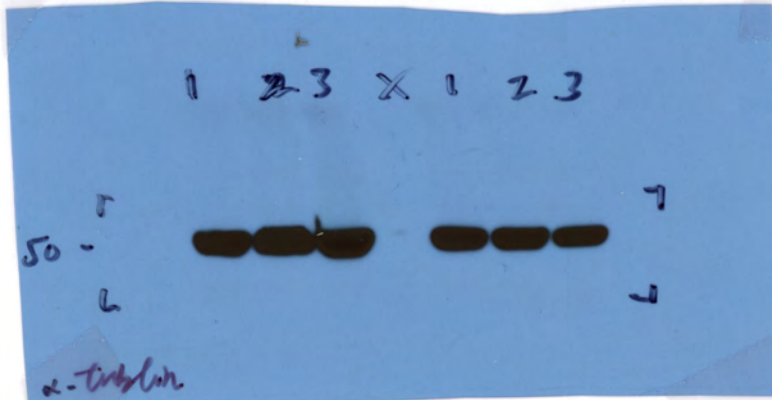

Fig. 1A, 2A

Acetylation TC-Hyp, LG-endo HIF2 $\alpha$ -IP: sp-IB: endo HIF2 $\alpha$ , Ack / HCT116 cells

Hypoxia  
(Hyp)

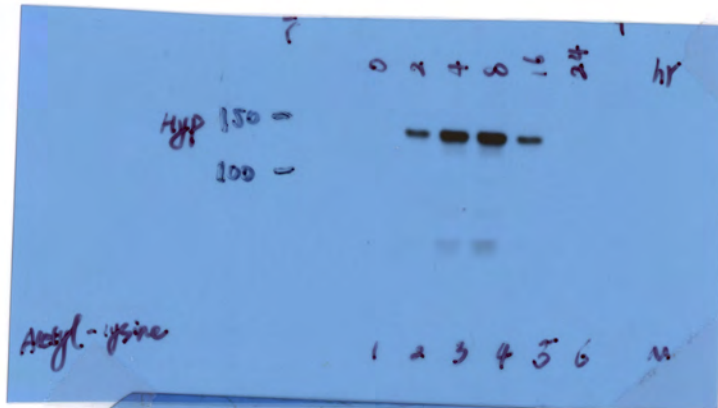

Fig 1C (left panel)

IP: HIF-2 $\alpha$   
IB: ACETYL-  
LYSINE

IP: HIF-2 $\alpha$   
IB: HIF-2 $\alpha$

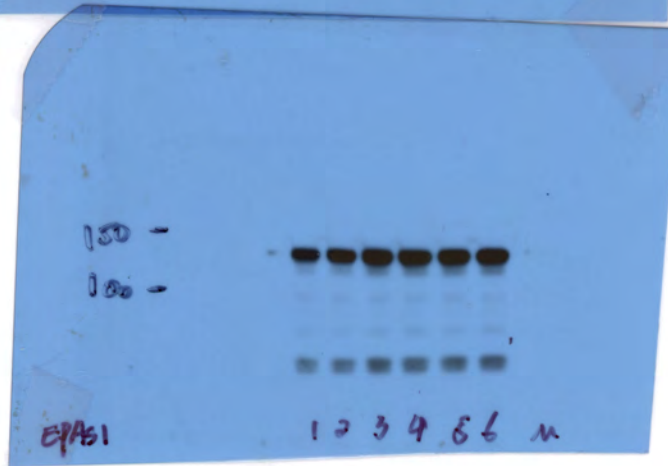

Low Glucose  
(LG)

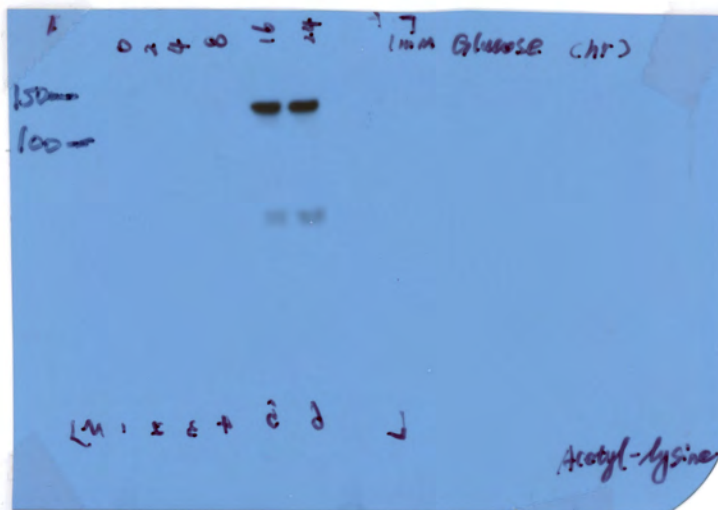

Fig 1C (right panel)

IP: HIF-2 $\alpha$   
IB: ACETYL-  
LYSINE

IP: HIF-2 $\alpha$   
IB: HIF-2 $\alpha$

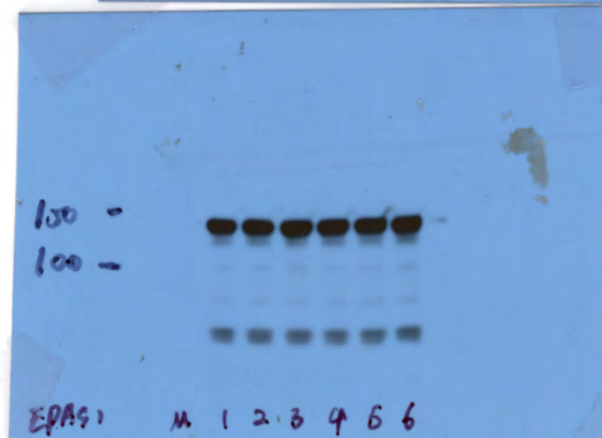

Fig. (D)  
(left panel)

CoIP (3 time-points)  
Normoxia, Hypoxia - endo  
HIF2α, cbp, p300-IP  
HIF2α-IB: HIF2α,  
cbp, p300

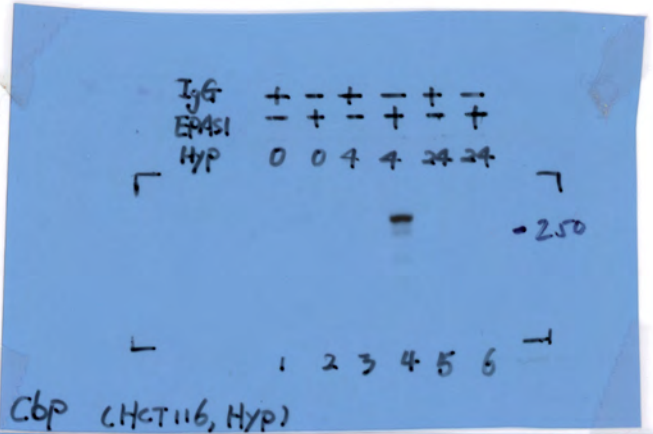

Hypoxia (HYP)  
IP: HIF2α  
IB: CBP

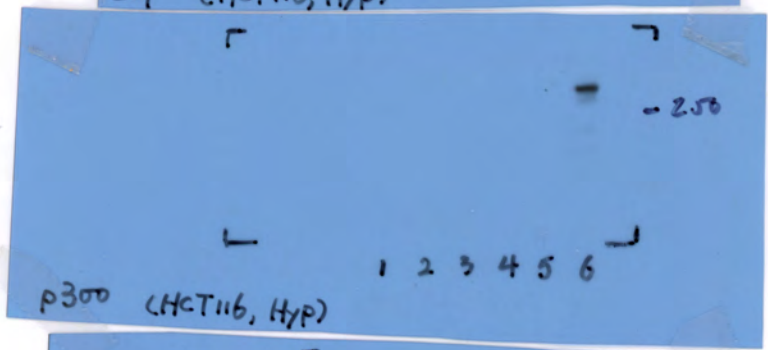

IP: HIF2α  
IB: HIF-2α

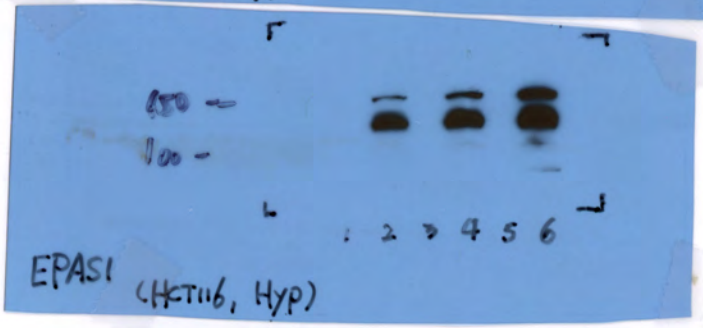

LOAD  
IB: CBP

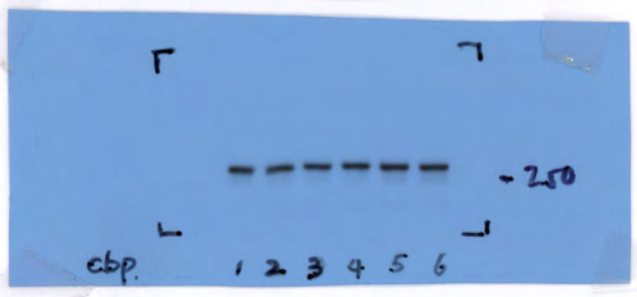

LOAD  
IB: p300

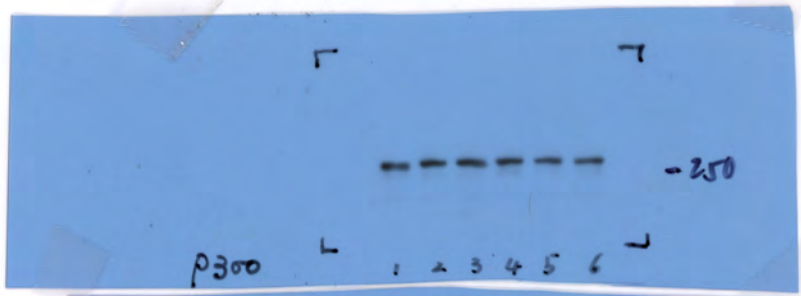

LOAD  
IB: α-TUBULIN

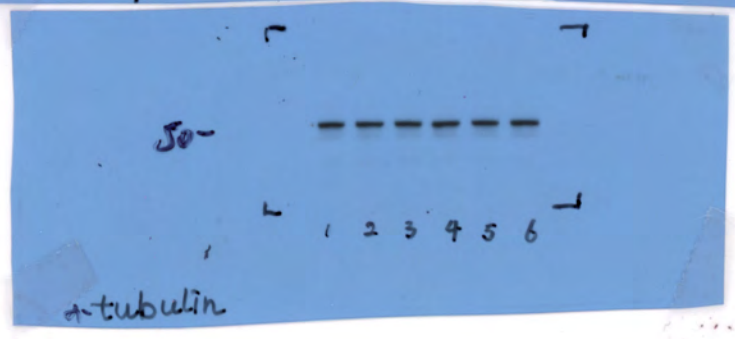

CoIP (3 time-points)

Norm, LG - endo HIF2 $\alpha$ ,  
cbp, p300 - IP: HIF2 $\alpha$  -  
IB: HIF2 $\alpha$ , cbp, p300  
HCT116 WHOLE CELL  
EXTRACTS

|       |   |   |    |    |    |    |
|-------|---|---|----|----|----|----|
| IgG   | + | - | +  | -  | +  | -  |
| EPAS1 | - | + | -  | +  | -  | +  |
| LG    | 0 | 0 | 4+ | 4+ | 2+ | 2+ |

Fig. 1D  
(right panel)

Low  
Glucose  
(LG)  
IP: HIF-2 $\alpha$   
IB: CBP

cbp (HCT116, LG)

IP: HIF2 $\alpha$   
IB: p300

IP: HIF-2 $\alpha$   
IB: HIF-2 $\alpha$

LOAD  
IB: CBP

LOAD  
IB: p300

LOAD  
IB:  $\alpha$ -Tubulin

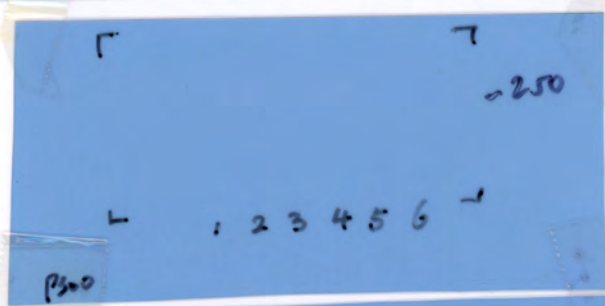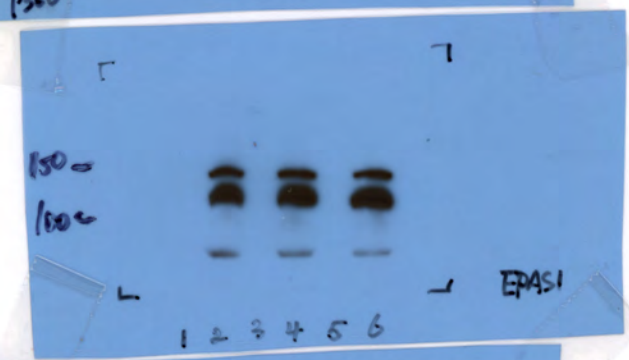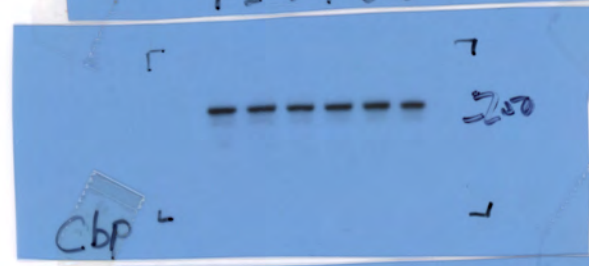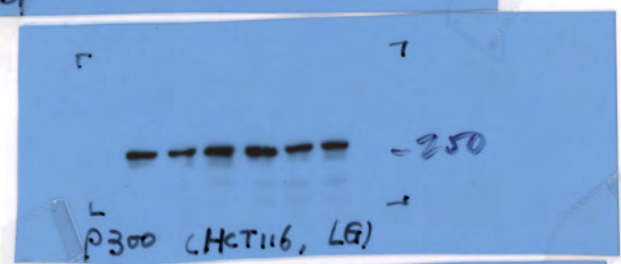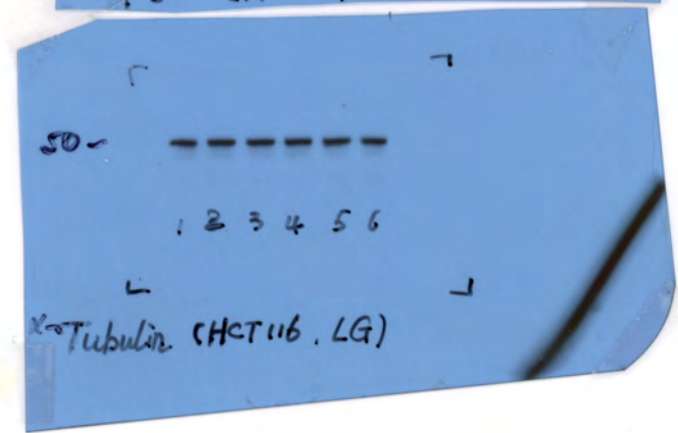

Acetylation TC- Hyp, LG - endo HIF2 $\alpha$  - IP: SP- IB: endo HIF2 $\alpha$ , AcK / HT29 cells

Hypoxia  
(HYP)  
IP: HIF-2 $\alpha$   
IB: ACETYL-  
LYSINE

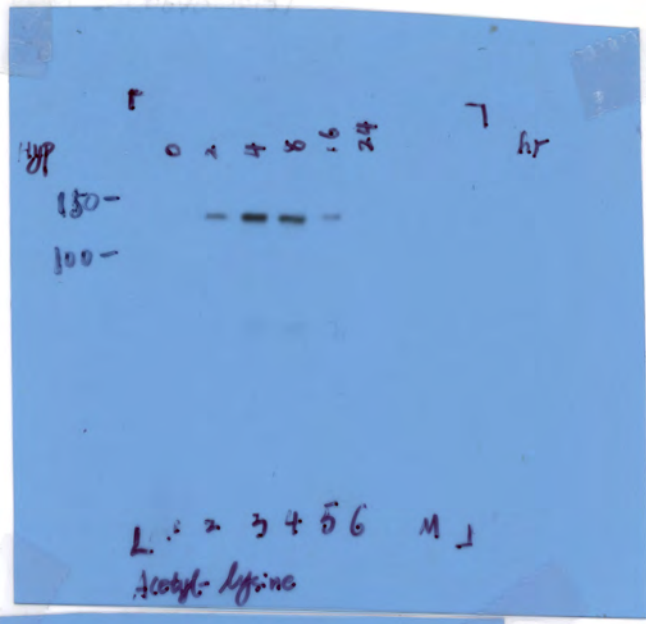

Fig 2C (left panel)

IP: HIF-2 $\alpha$   
IB: HIF-2 $\alpha$

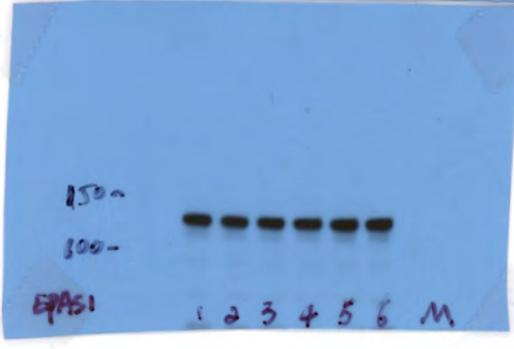

Low Glucose  
(LG)  
IP: HIF-2 $\alpha$   
IB: ACETYL-  
LYSINE

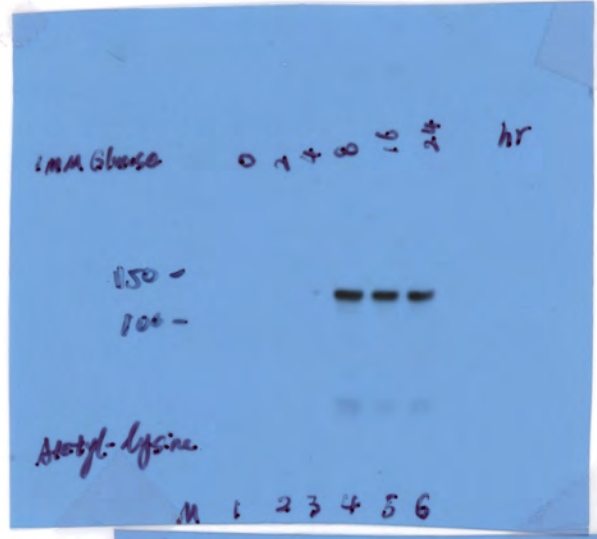

Fig 2C (right panel)

IP: HIF-2 $\alpha$   
IB: HIF-2 $\alpha$

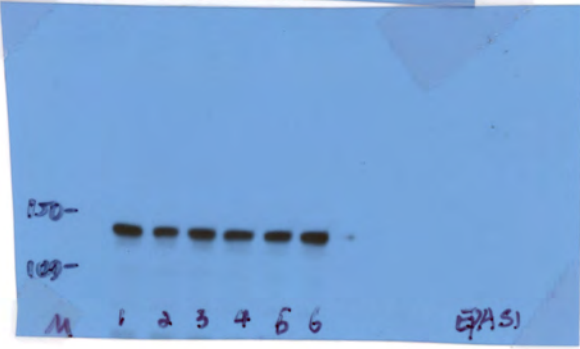

Fig. 2D  
(left panel)

CoIP (3 time-points)  
 - Normoxia, Hypoxia  
 - endo HIF2α, cbp,  
 p300 - IP: HIF2α - IB:  
 HIF2α, cbp, p300 in  
 HT29 whole cell  
 extracts  
 Hypoxia IP: HIF-2α  
 (Hyp) IB: CBP

|       |   |   |   |   |    |    |
|-------|---|---|---|---|----|----|
| IP:   | + | - | + | - | +  | -  |
| ERAS1 | - | + | - | + | -  | +  |
| Hyp   | 0 | 0 | 4 | 4 | 24 | 24 |

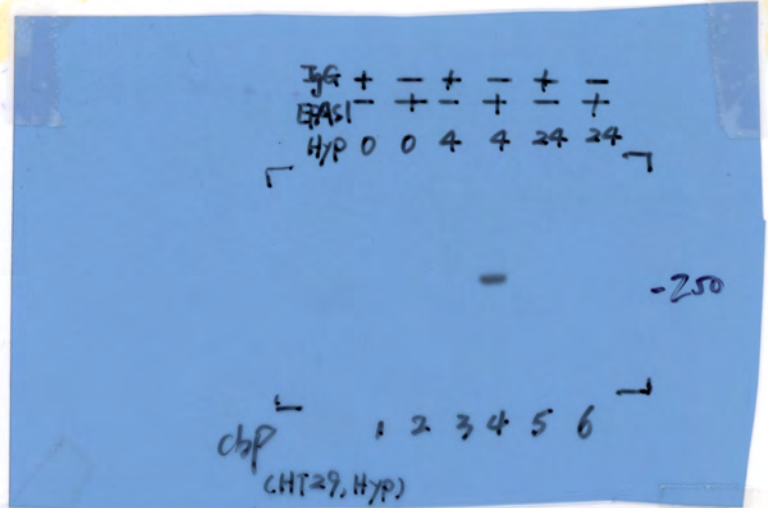

IP: HIF-2α  
 IB: p300

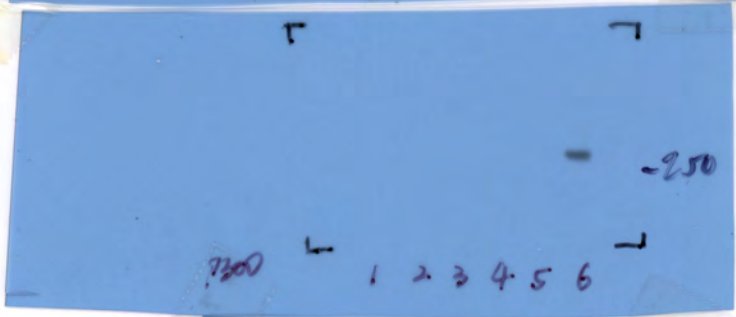

IP: HIF-2α  
 IB: HIF-2α

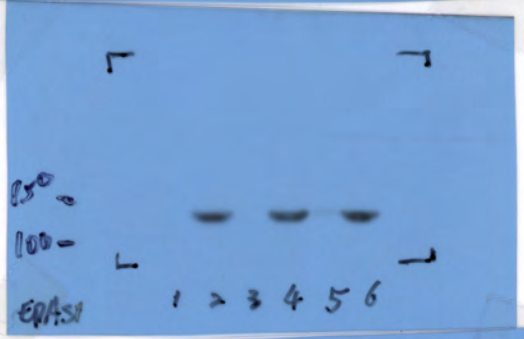

LOAD  
 IB: CBP

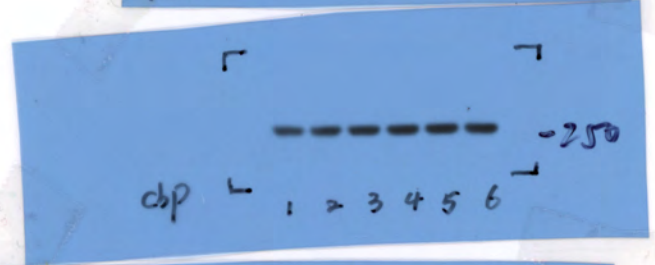

LOAD  
 IB: p300

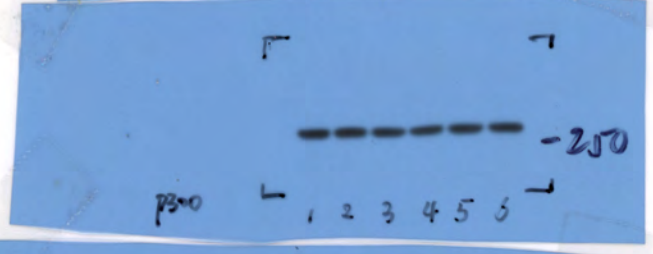

LOAD  
 IB: α-tubulin

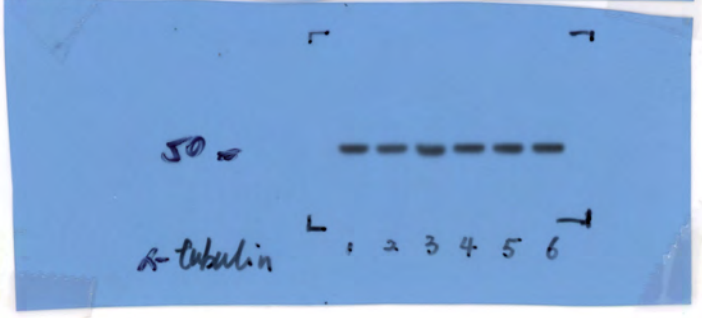

Fig. 2D

(right panel)

CoIP (3 time-points)

Normoxia, Low glucose

endo: HIF2 $\alpha$ , cbp, p300

IP: HIF2 $\alpha$  - IB: HIF2 $\alpha$ ,

cbp, p300 in HIF-2 $\alpha$  cells

H729 whole cell extracts

|       |   |   |   |   |    |    |
|-------|---|---|---|---|----|----|
| IgG   | + | - | + | - | +  | -  |
| EPAS1 | - | + | - | + | -  | +  |
| LG    | 0 | 0 | 4 | 4 | 24 | 24 |

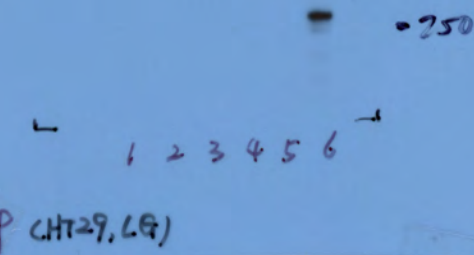

Low Glucose (LG) IP: HIF-2 $\alpha$  IB: CBP

IP: HIF-2 $\alpha$  IB: p300

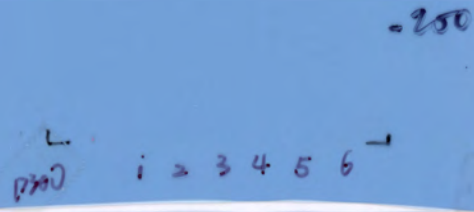

IP: HIF-2 $\alpha$  IB: HIF-2 $\alpha$

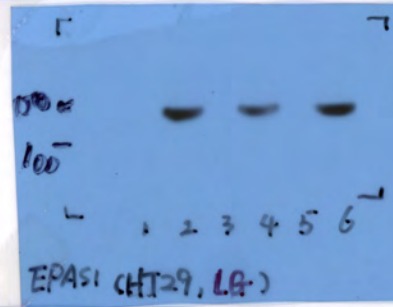

LOAD IB: CBP

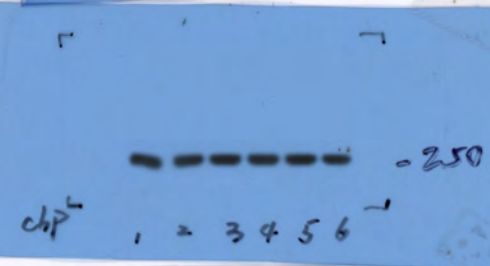

LOAD IB: p300

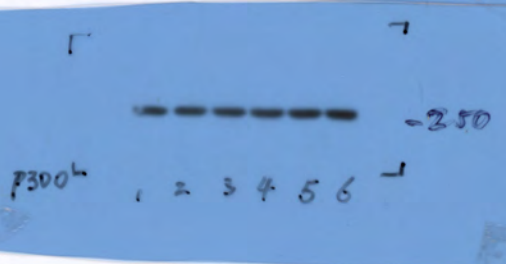

LOAD IB:  $\alpha$ -TUBULIN

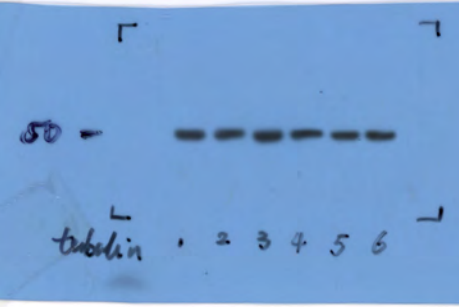

Hypoxia  
(HYP)

Acetylation TC - Hyp - endo HIF2 $\alpha$  - IP: SP, IB: endo HIF2 $\alpha$ , AcK  
HCT 116 WHOLE CELL EXTRACTS

Fig. 3A  
(left panel)

IP: HIF-2 $\alpha$   
IB: ACETYL-  
LYSINE

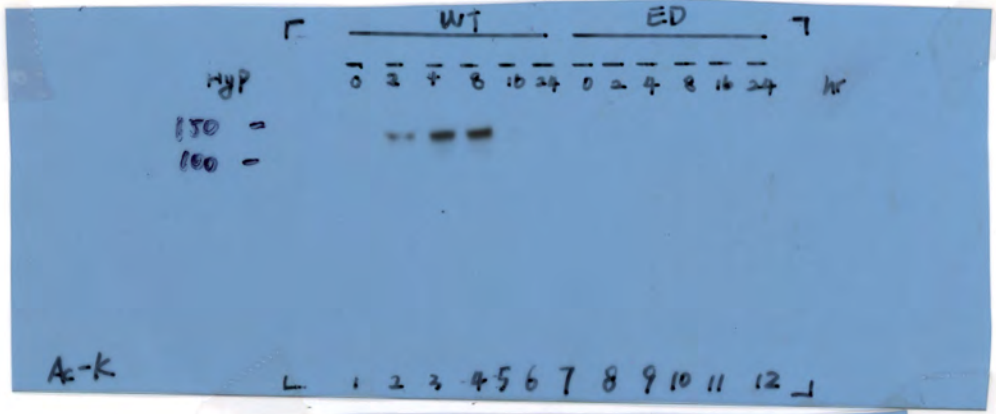

Acss2  
~~KnockDown~~  
RESCUE

IP: HIF-2 $\alpha$   
IB: HIF-2 $\alpha$

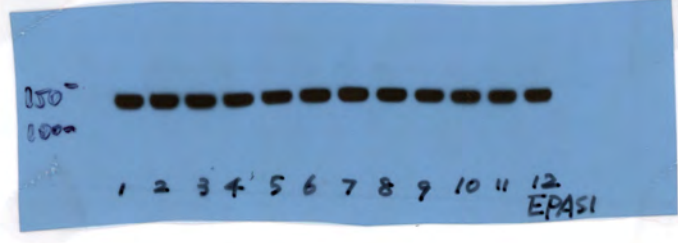

IP: HIF-2 $\alpha$   
IB: ACETYL-  
LYSINE

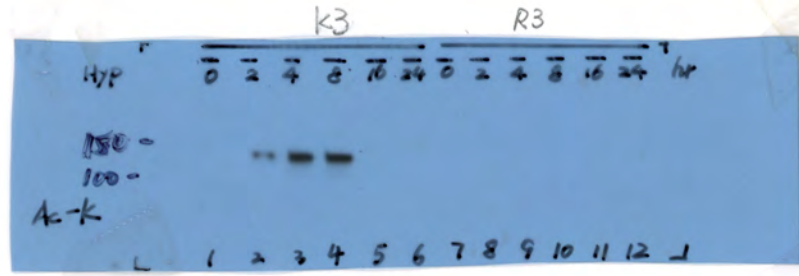

HIF-2 $\alpha$   
~~KnockDown~~  
RESCUE

IP: HIF-2 $\alpha$   
IB: HIF-2 $\alpha$

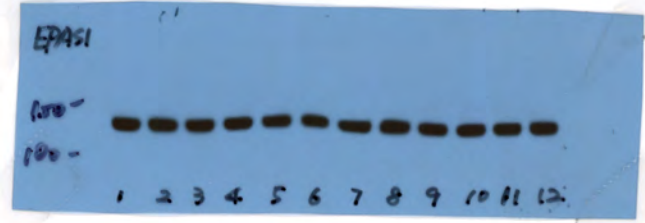



Low Glucose (LG)

Acetylation TC - LG - endo HIF2α - IP: SP, IB: endo HIF2α, AcK  
in HCT116 WHOLE CELL EXTRACTS

Fig. 3A

(right panel)

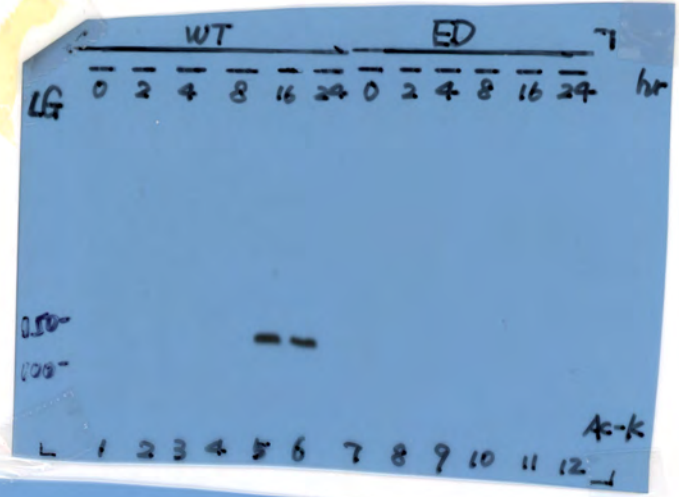

IP: HIF-2α  
IB: ACETYL-LYSINE

AcSS2  
Knock Down  
REScue

IP: HIF-2α  
IB: HIF-2α

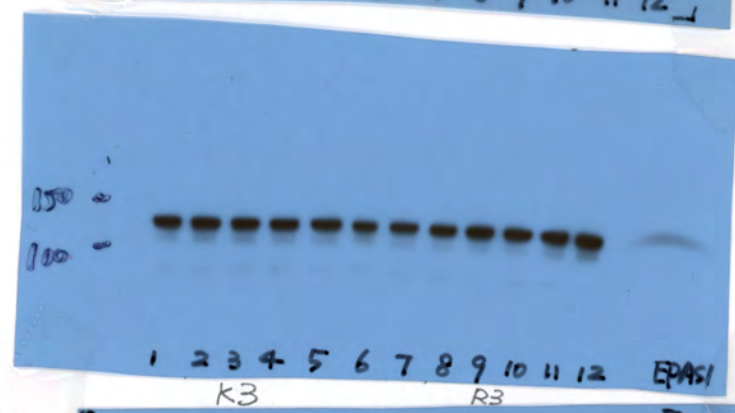

IP: HIF-2α  
IB: ACETYL-LYSINE

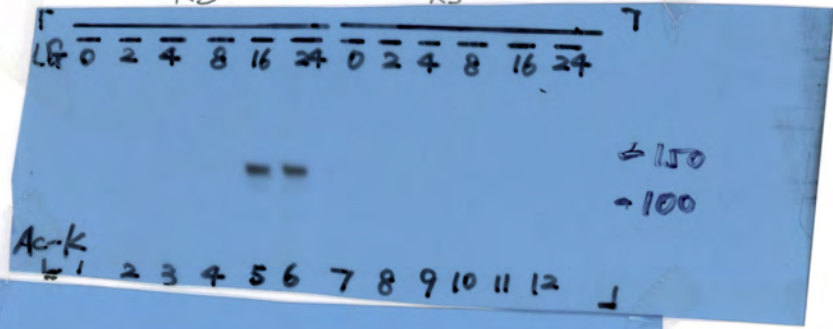

HIF-2α  
Knock Down  
REScue

IP: HIF2α  
IB: HIF-2α  
EPAS1

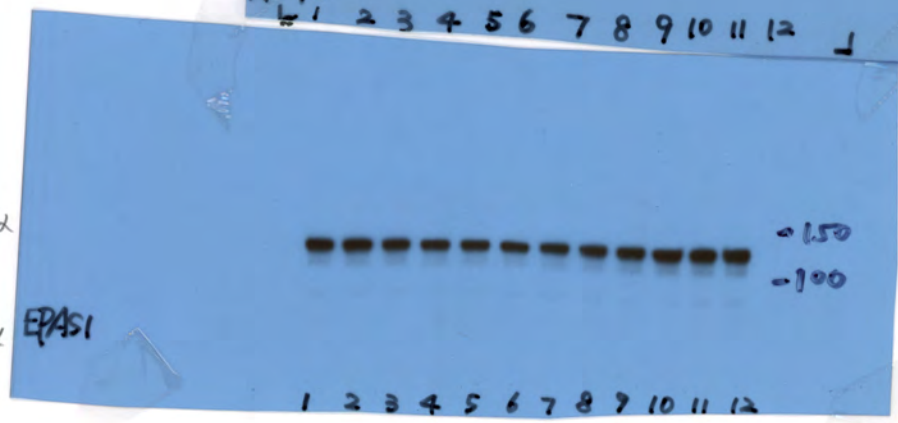

CoIP - Normoxia, Hypoxia - endo HIF2 $\alpha$ , cbp, p300 - WT, ED

-WT/ED in HCT116 WHOLE CELL EXTRACTS

Fig. 3B

(left panel)  
lower

HYPOXIA  
(HYP)

IP: HIF-2 $\alpha$

IB: CBP

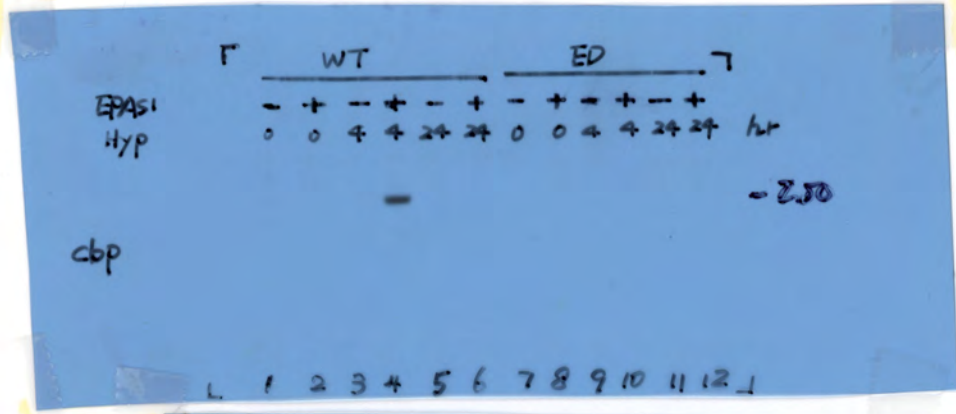

Acss2

~~KNOCKDOWN~~  
~~RESCUE~~

IP: HIF-2 $\alpha$

IB: p300

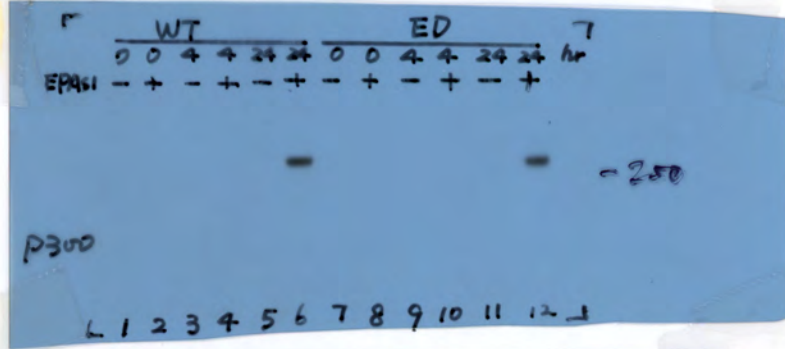

IP: HIF-2 $\alpha$

IB: HIF-2 $\alpha$

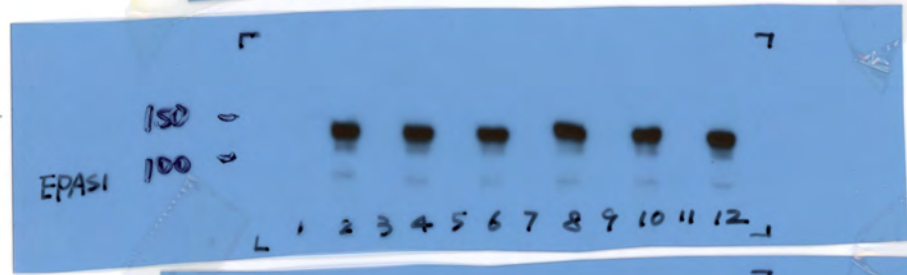

INPUT

IB:  $\alpha$ -Tubulin

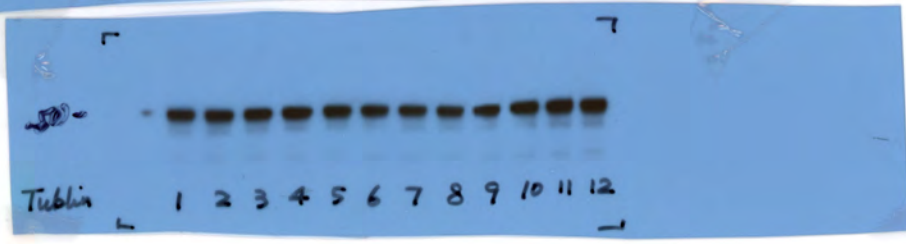

Fig. 3B

(left panel)  
Upper

CoIP - Normoxia, Hypoxia - endo HIF2 $\alpha$ , cbp, p300  
- K3/R3 in HCT116 WHOLE CELL EXTRACTS

Hypoxia  
(HYP)

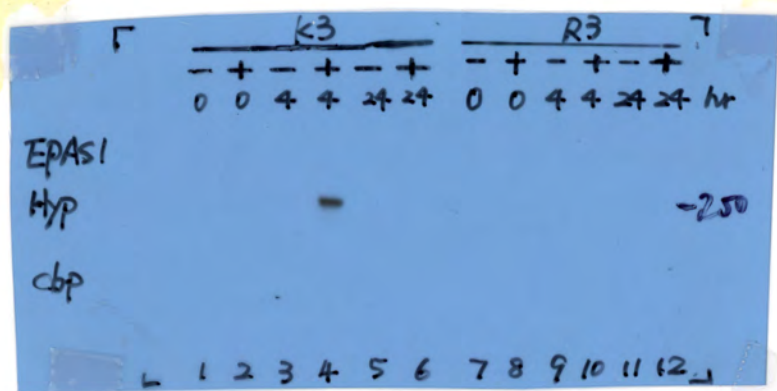

IP: HIF-2 $\alpha$   
IB: CBP

HIF-2 $\alpha$   
~~knockdown~~  
RESCUE

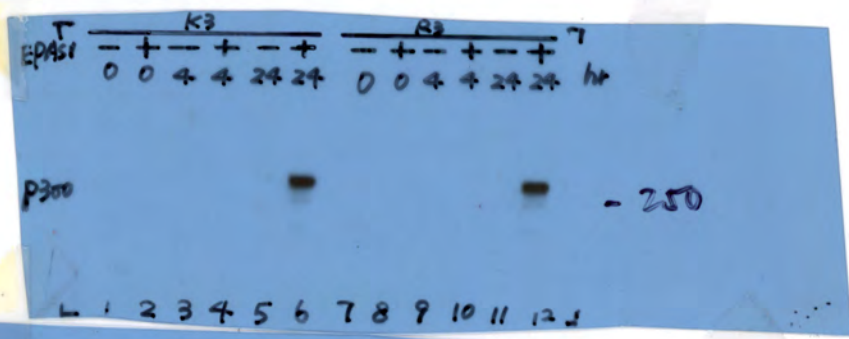

IP: HIF-2 $\alpha$   
IB: p300

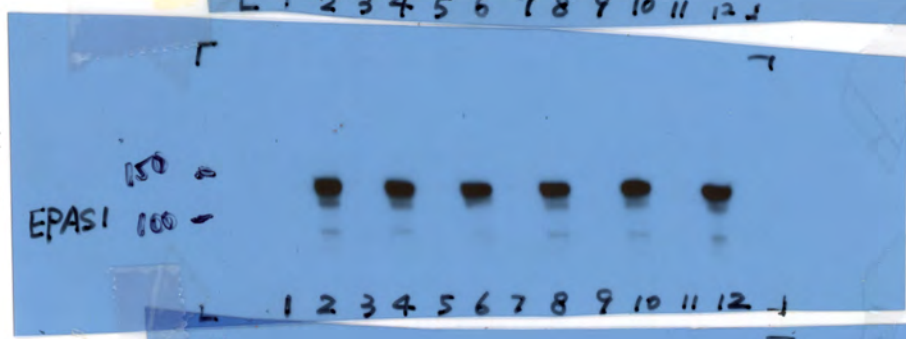

IP: HIF-2 $\alpha$   
IB: HIF-2 $\alpha$

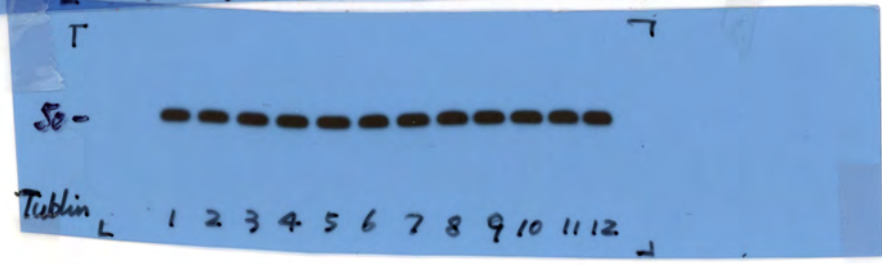

INPUT  
IB:  $\alpha$ -Tubulin

CoIP - Normoxia, Lowglucose - endo HIF2 $\alpha$ , cbp, p300  
 WT/ED in HCT116 WHOLE CELL EXTRACTS

Fig 3B

(right panel)  
 lower

Low Glucose  
 (LG)

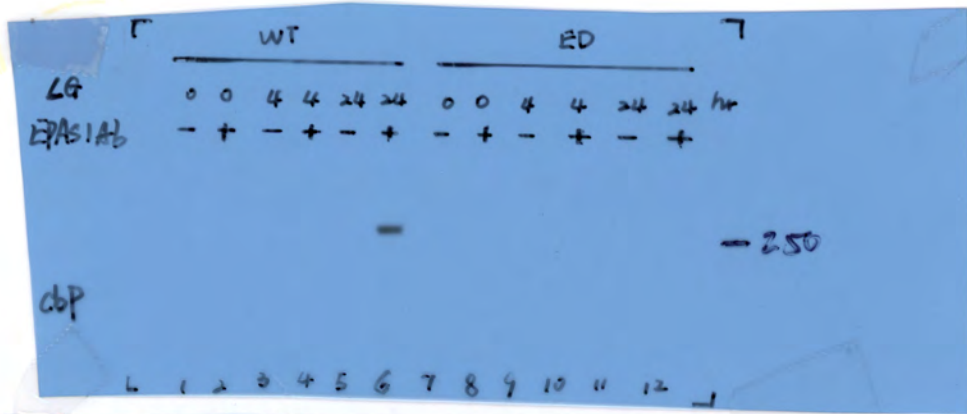

IP: HIF-2 $\alpha$

IB: cbp

Acss2

knockdown

rescue

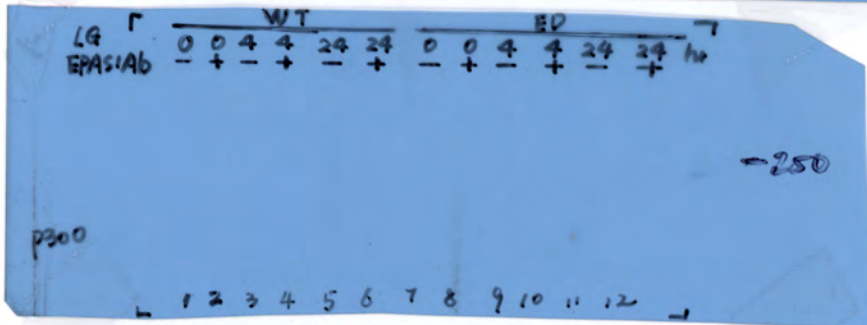

IP: HIF-2 $\alpha$

IB: p300

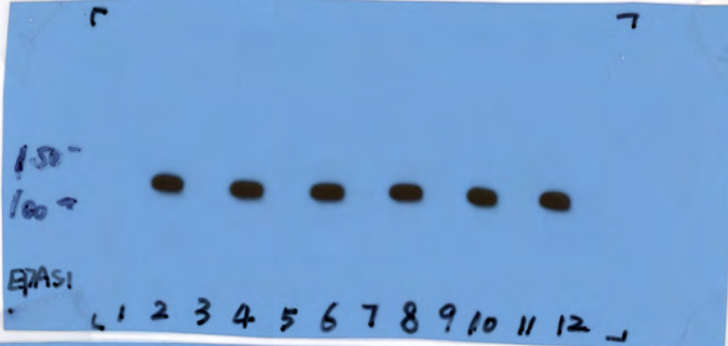

IP: HIF-2 $\alpha$

IB: HIF-2 $\alpha$

INPUT

IB:  $\alpha$ -tubulin

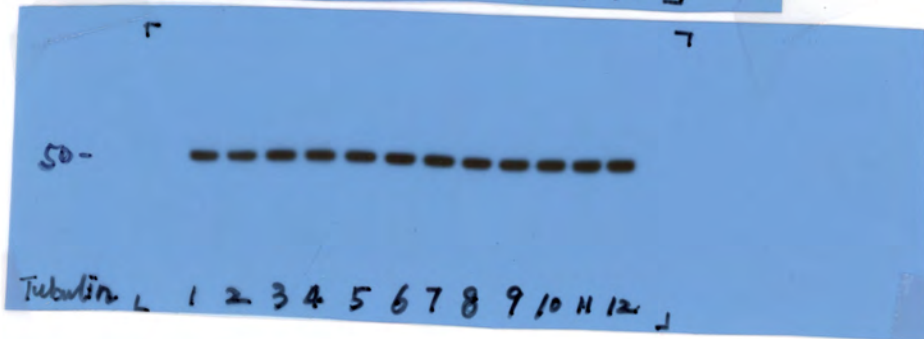

Low Glucose (LG)

CoIP - Normoxia, Lowglucose - endo HIF2α, cbp, p300  
 K3/R3 in HCT116 WHOLE CELL EXTRACTS

Fig. 3B  
 (right panel)  
 upper

IP: HIF-2α  
 IB: CBP

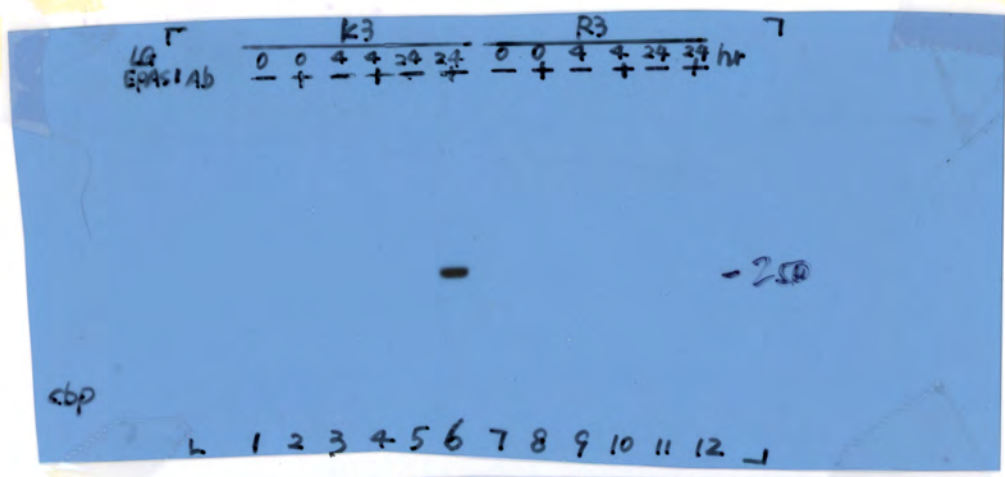

HIF-2α  
 KNOCKDOWN  
 RESCUE

IP: HIF-2α  
 IB: p300

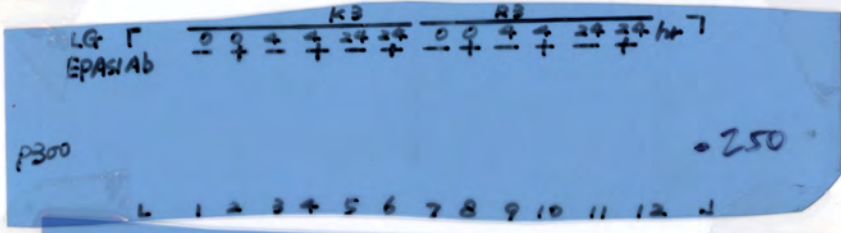

IP: HIF-2α  
 IB: HIF-2α

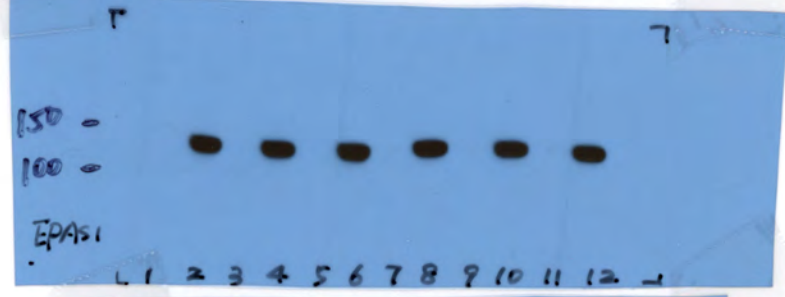

INPUT  
 IB: α-Tubulin

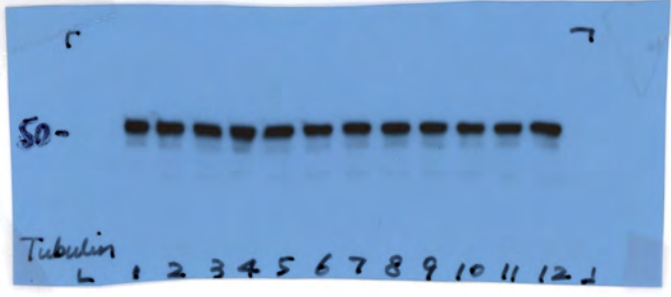

HYPoxIA  
(HYP)

Acetylation TC-Hyp-endo HIF2 $\alpha$ -IP; SP, IB: endo HIF-2 $\alpha$ , ActK  
H1297 WHOLE CELL EXTRACTS

Fig. 4A  
(left panel)

IP: HIF-2 $\alpha$   
IB: ACETYL-  
LYSINE

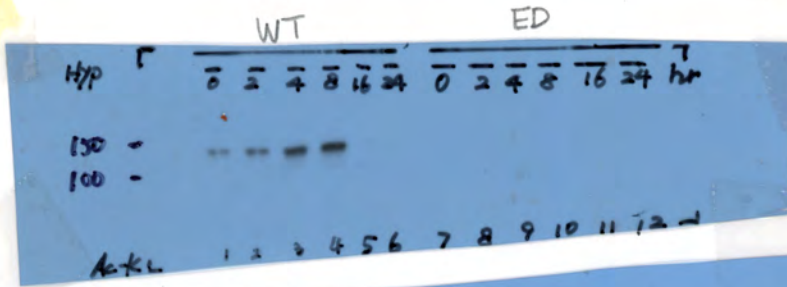

Acsl2

~~Knockdown~~  
RESCUE

IP: HIF-2 $\alpha$   
IB: HIF-2 $\alpha$

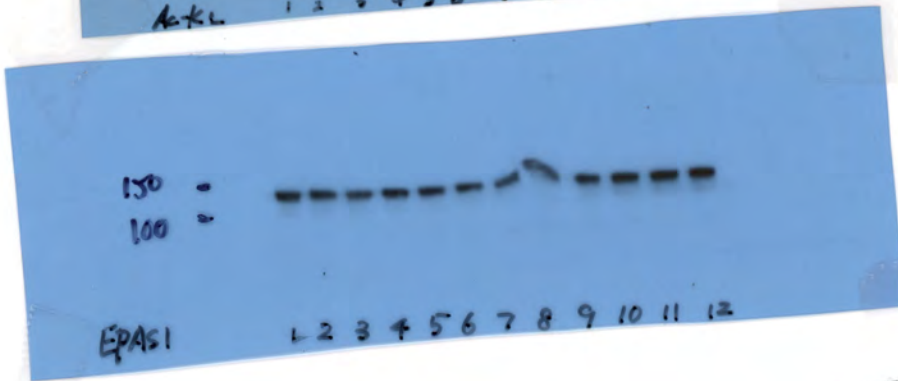

IP: HIF-2 $\alpha$   
IB: ACETYL-  
LYSINE

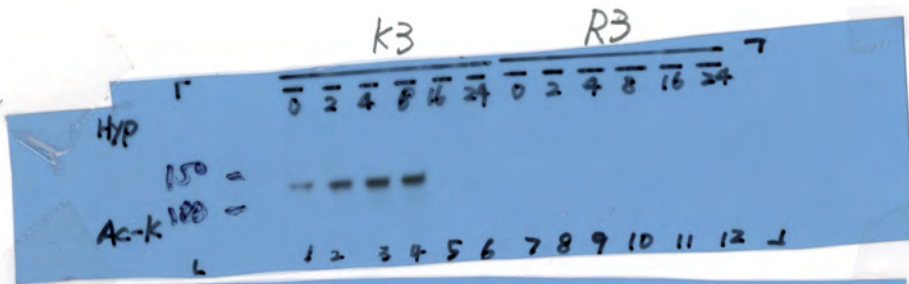

HIF-2 $\alpha$

~~Knockdown~~  
RESCUE

IP: HIF-2 $\alpha$   
IB: HIF-2 $\alpha$

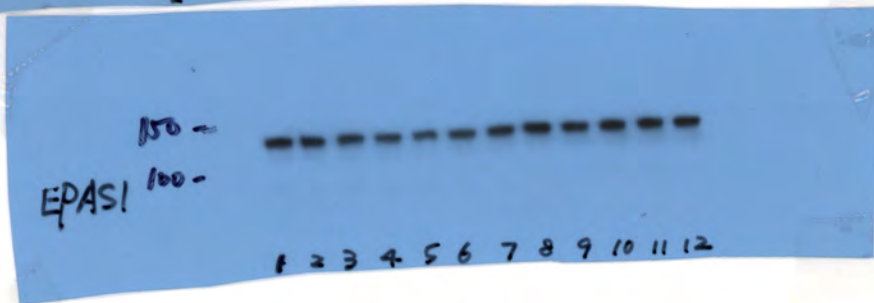

Acetylation TC - LG - endo HIF2α - IP: SP, IB endo HIF2α, AcK  
 HT-29 WHOLE CELL EXTRACTS

Fig 4A  
 (right panel)

Low Glucose  
 (LG)

IP: HIF-2α  
 IB: ACETYL-  
 LYSINE

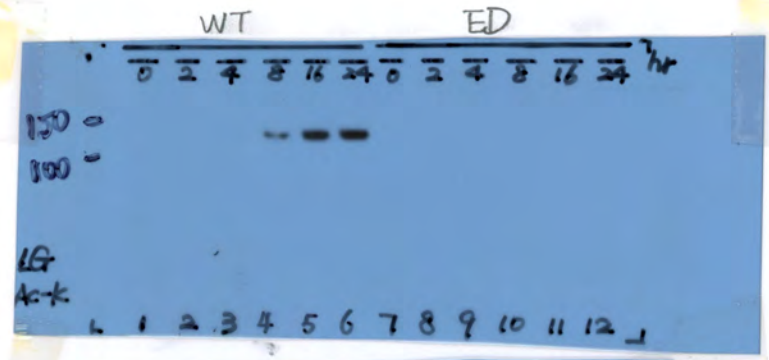

AcSS2  
 KNOCKDOWN /  
 RESCUE

IP: HIF-2α  
 IB: HIF-2α

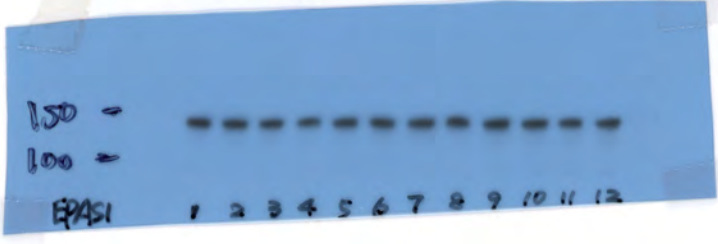

IP: HIF-2α  
 IB: ACETYL-  
 LYSINE

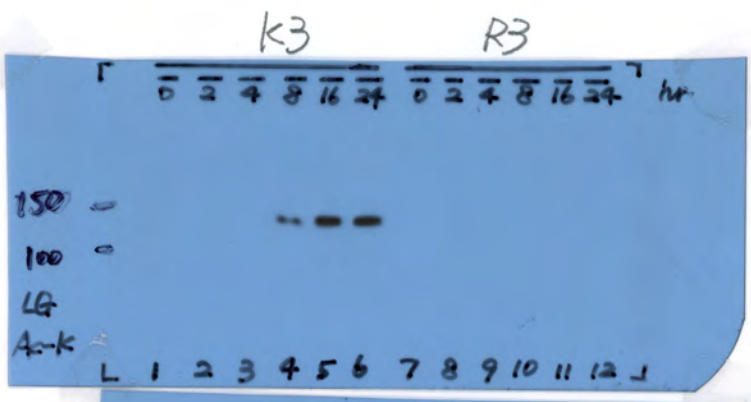

HIF-2α  
 KNOCKDOWN /  
 RESCUE

IP: HIF-2α  
 IB: HIF-2α

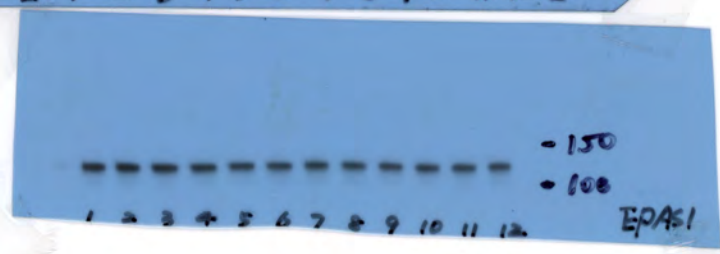

CoIP - Normoxia, Hypoxia - endo HIF2 $\alpha$ , cbp, p300  
 - WT/ED in HT29 WHOLE CELL EXTRACTS

Fig. 4B  
 (left panel)  
 lower

HYPOXIA  
 (HYP)

IP: HIF-2 $\alpha$   
 IB: CBP

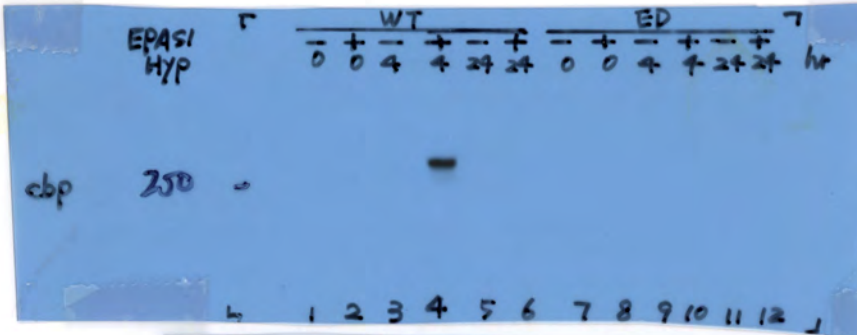

Acss2  
 KNOCKDOWN  
 RESCUE

IP: HIF-2 $\alpha$   
 IB: p300

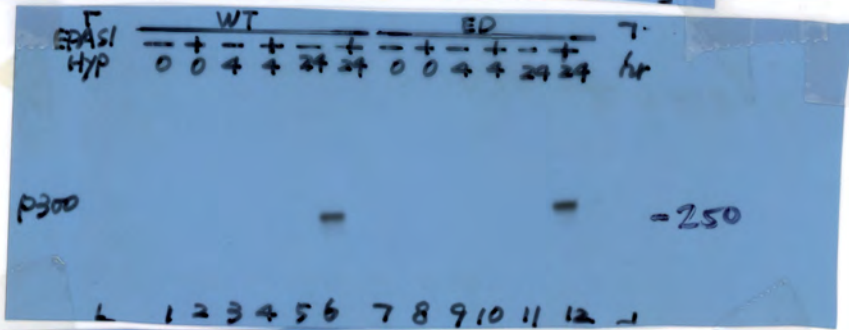

IP: HIF-2 $\alpha$   
 IB: HIF-2 $\alpha$

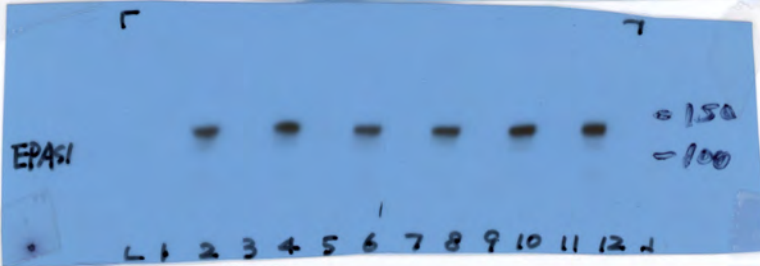

IP: p97

IB:  $\alpha$ -TUBULIN

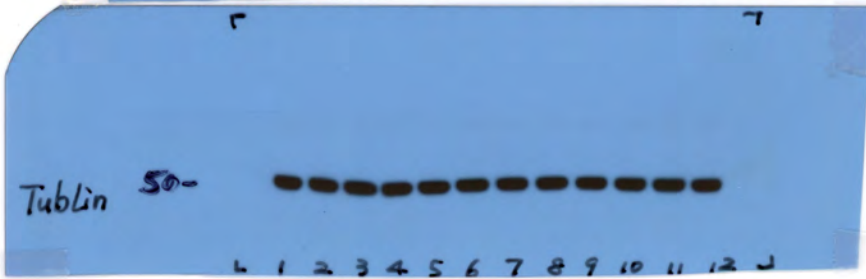



CoIP - Normoxia, Hypoxia - endo HIF2 $\alpha$ , cbp, p300  
 - K3/R3 in HT29 WHOLE CELL EXTRACTS

Fig. 4B

(left panel)  
 upper

Hypoxia  
 (HYP)

IP: HIF-2 $\alpha$   
 IB: CBP

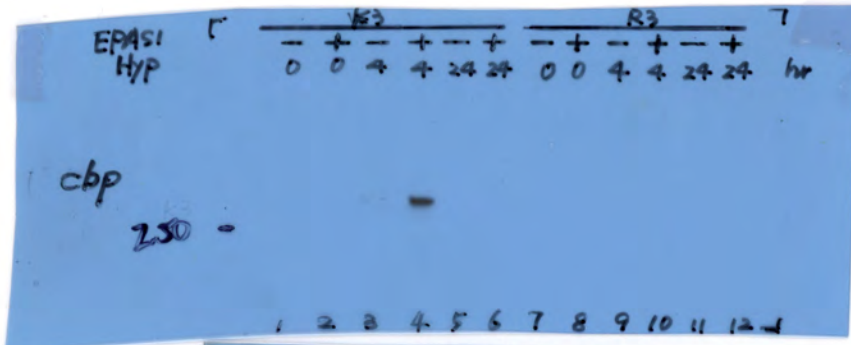

HIF-2 $\alpha$   
 KNOCKDOWN  
 RESCUE

IP: HIF-2 $\alpha$   
 IB: p300

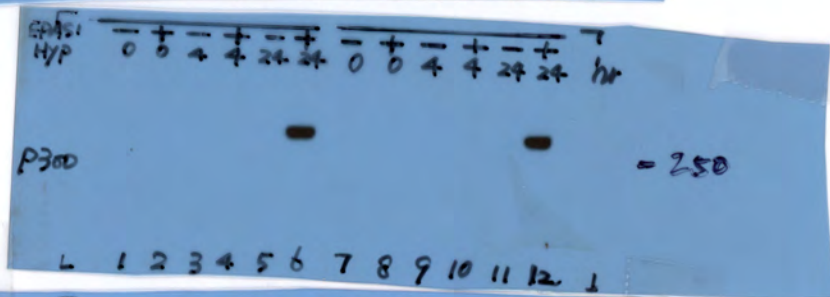

IP: HIF-2 $\alpha$   
 IB: HIF-2 $\alpha$

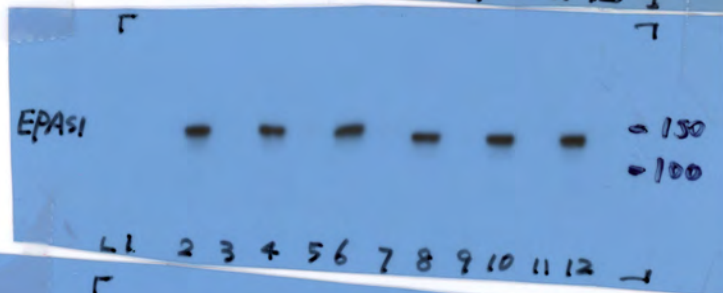

INPUT  
 IB:  $\alpha$ -Tubulin

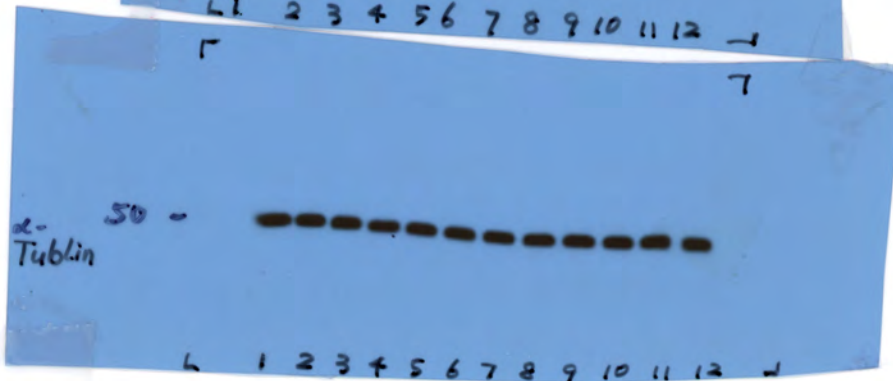

CoIP - Normoxia, Lowglucose - endo HIF2 $\alpha$ , cbp, p300  
 - WT/ED in HT29 WHOLE CELL EXTRACTS

Fig. 4B

(right panel)  
 lower

Low Glucose  
 (LG)

IP: HIF-2 $\alpha$   
 IB: CBP

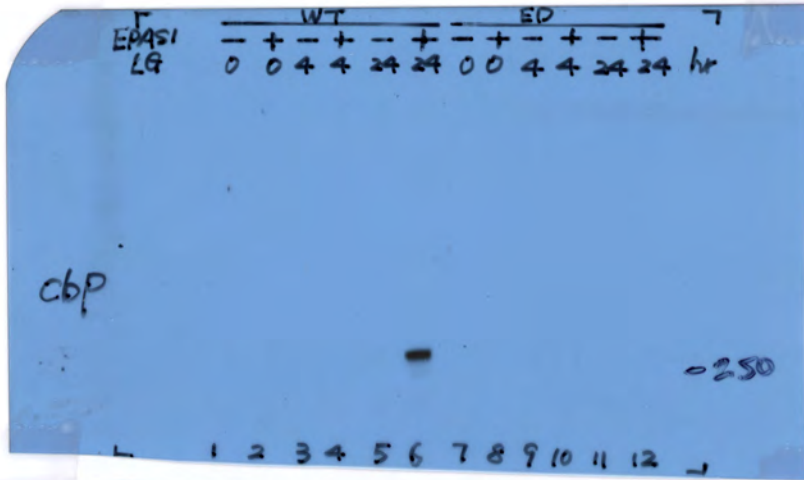

Access 2  
~~KnockDown~~  
 RESCUE

IP: HIF-2 $\alpha$   
 IB: p300

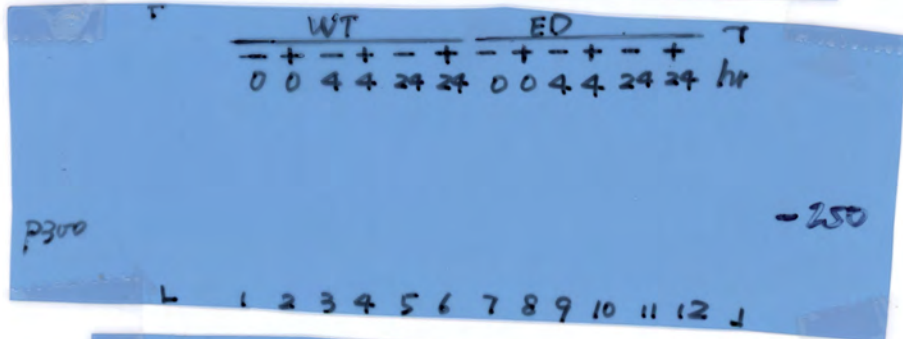

IP: HIF-2 $\alpha$   
 IB: HIF-2 $\alpha$

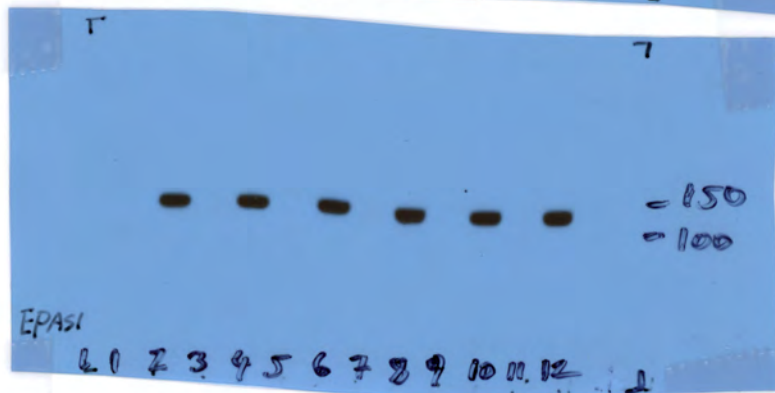

IP: ACT  
 IB:  $\alpha$ -Tubulin

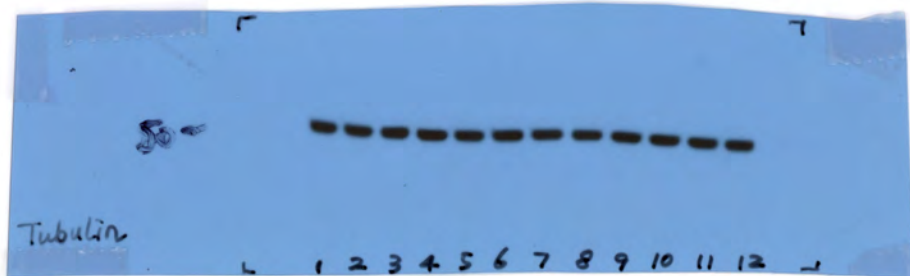

CoIP - Notmaxiq, low glucose - endo HIF-2 $\alpha$ , Cbp, p300

Fig. 4B

K3/R3 in HT29 WHOLE CELL EXTRACTS

(right panel)  
upper

Low GLUCOSE  
(LG)

IP: HIF-2 $\alpha$   
IB: CBP

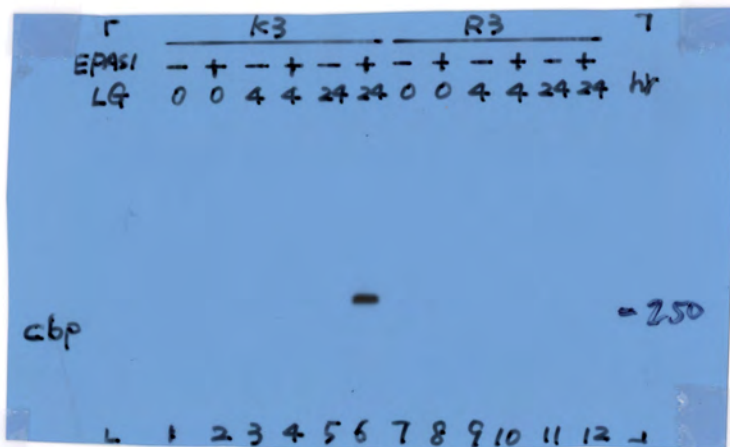

HIF-2 $\alpha$   
~~KNOCKDOWN~~  
RESCUE

IP: HIF-2 $\alpha$

IB: p300

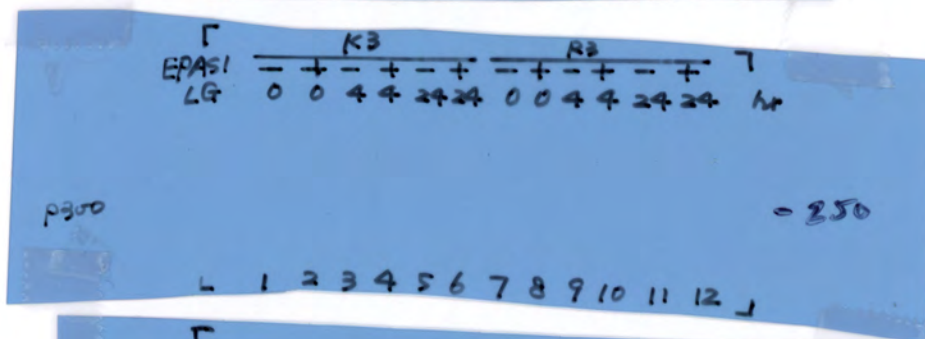

IP: HIF-2 $\alpha$

IB: HIF-2 $\alpha$

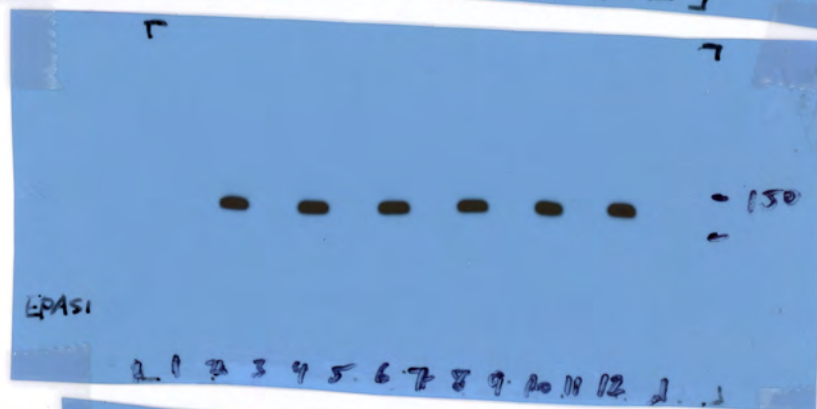

INPUT

IB:  $\alpha$ -TUBULIN

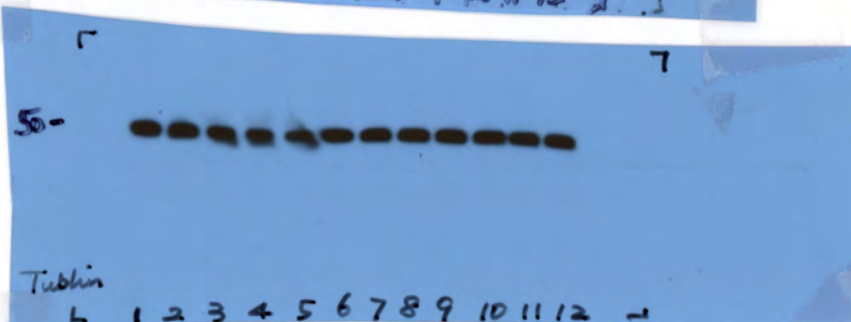

Supplement: pone.0282223.s001.pdf [file pone.0282223.s001.pdf]
